# Supplementary material
Source: PubMed Central journal article supplement (PMC2903934)
Supplement: en.2010-0016_1.pdf [file en.2010-0016_1.pdf]

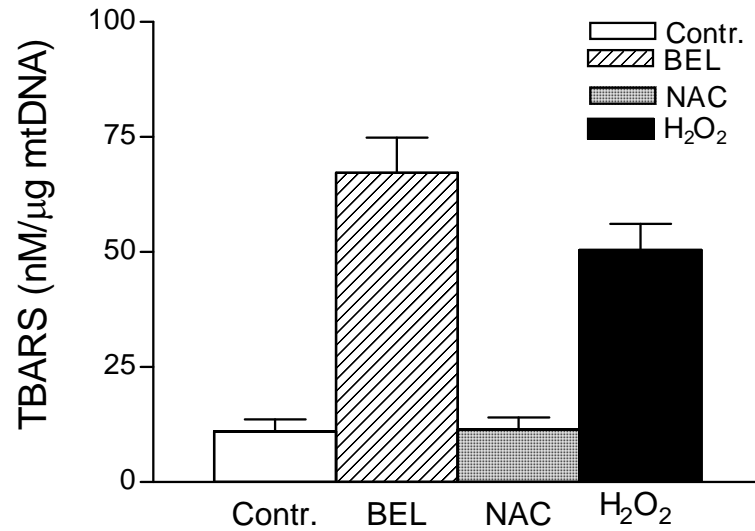

**Fig 1. TBARS assay of mitochondrial membrane peroxidation in INS-1 cells.** INS-1 cells were incubated with 25  $\mu$ M BEL in the presence of 11 mM glucose for 48 hrs. Mitochondria were isolated and were subjected to TBARS assay and total mtDNA measurement. Data were normalized by total mtDNA and TBARS (nM/ $\mu$ g mtDNA) in each condition were present as the mean  $\pm$  SEM of three independent experiments.
